# Supplementary material
Source: PubMed Central journal article supplement (PMC6707076)

# **Development of a bioconjugate platform for modifying the immune response of autoreactive cytotoxic T lymphocytes involved in type 1 diabetes**

Neha Nandedkar-Kulkarni<sup>1</sup>, Abhishek R. Vartak<sup>2</sup>, Steven J. Sucheck<sup>2</sup>, Katherine A. Wall<sup>1</sup>, Anthony Quinn<sup>3</sup>, Michael P. Morran<sup>1</sup>, and Marcia F. McInerney<sup>1,4\*</sup>

<sup>1</sup> Department of Medicinal and Biological Chemistry, University of Toledo, College of Pharmacy and Pharmaceutical Sciences, Health Science Campus, 3000 Arlington Avenue, Toledo, Ohio 43614

<sup>2</sup> Department of Chemistry and Biochemistry, University of Toledo, College of Natural Sciences and Mathematics, Main Campus, 2801 West Bancroft Street, Toledo, Ohio 43606

<sup>3</sup> Department of Biological Sciences, University of Toledo, College of Natural Sciences and Mathematics, Main Campus, 2801 West Bancroft Street, Toledo, Ohio 43606

<sup>4</sup> Center for Diabetes and Endocrine Research, University of Toledo, Health Science Campus, 3000 Arlington Avenue, Toledo, Ohio 43614

\*E-mail: [marcia.mcinerney@utoledo.edu](mailto:marcia.mcinerney@utoledo.edu)

Supporting information is 10 pages and contains Figures S1-S9

## **List of Supporting Information Contents**

Page S1: Title of paper, author's names, address and table of contents

Page S2: Figure S1; Effect of GAD546-554 peptide on CTL546.L clone cells at different time points.

Page S3: Figure S2; MALDI-MS data of azide terminated GAD 541-554 peptide **2**

Page S4: Figure S3; HPLC trace of azide terminated GAD 541-554 peptide **2**

Page S5: Figure S4; MALDI-MS data of Pam<sub>3</sub>CysSK<sub>4</sub> - GAD 541-554 peptide conjugate **2a**

Page S6: Figure S5; MALDI-MS data of de-protected Pam<sub>3</sub>CysSK<sub>4</sub> - GAD 541-554 peptide conjugate **2b**

Page S7: Figure S6; MALDI-MS data for azide terminated altered peptide ligand (APL) **3**

Page S8: Figure S7; HPLC trace of azide terminated altered peptide ligand (APL) **3**

Page S9: Figure S8; MALDI-MS data of Pam<sub>3</sub>CysSK<sub>4</sub> - APL conjugate **3a**

Page S10; Figure S9; MALDI-MS data of de-protected Pam<sub>3</sub>CysSK<sub>4</sub> - APL conjugate **3b**

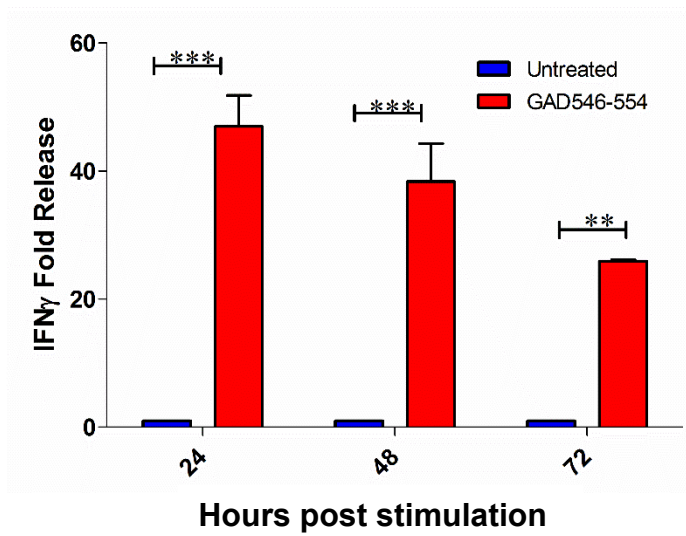

**Supplementary Figure S1.** Effect of GAD546-554 peptide on CTL546.L clone cells at different time points. CTL546.L cells were co-cultured with GAD546-554 pulsed irradiated M12C3.B7 B cells and evaluated for IFN $\gamma$  release. Supernatants were harvested at the indicated times after stimulation. One way ANOVA followed by Tukey's multiple comparison test. n=3, \*\*\*p  $\leq$  0.01. IFN $\gamma$  release was normalized to untreated control.

Supplementary Figure S2. MALDI-MS data of azide terminated GAD 541-554 peptide 2

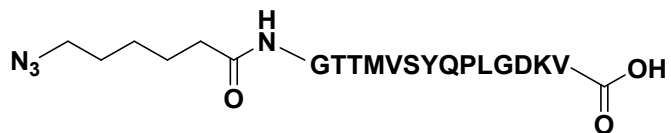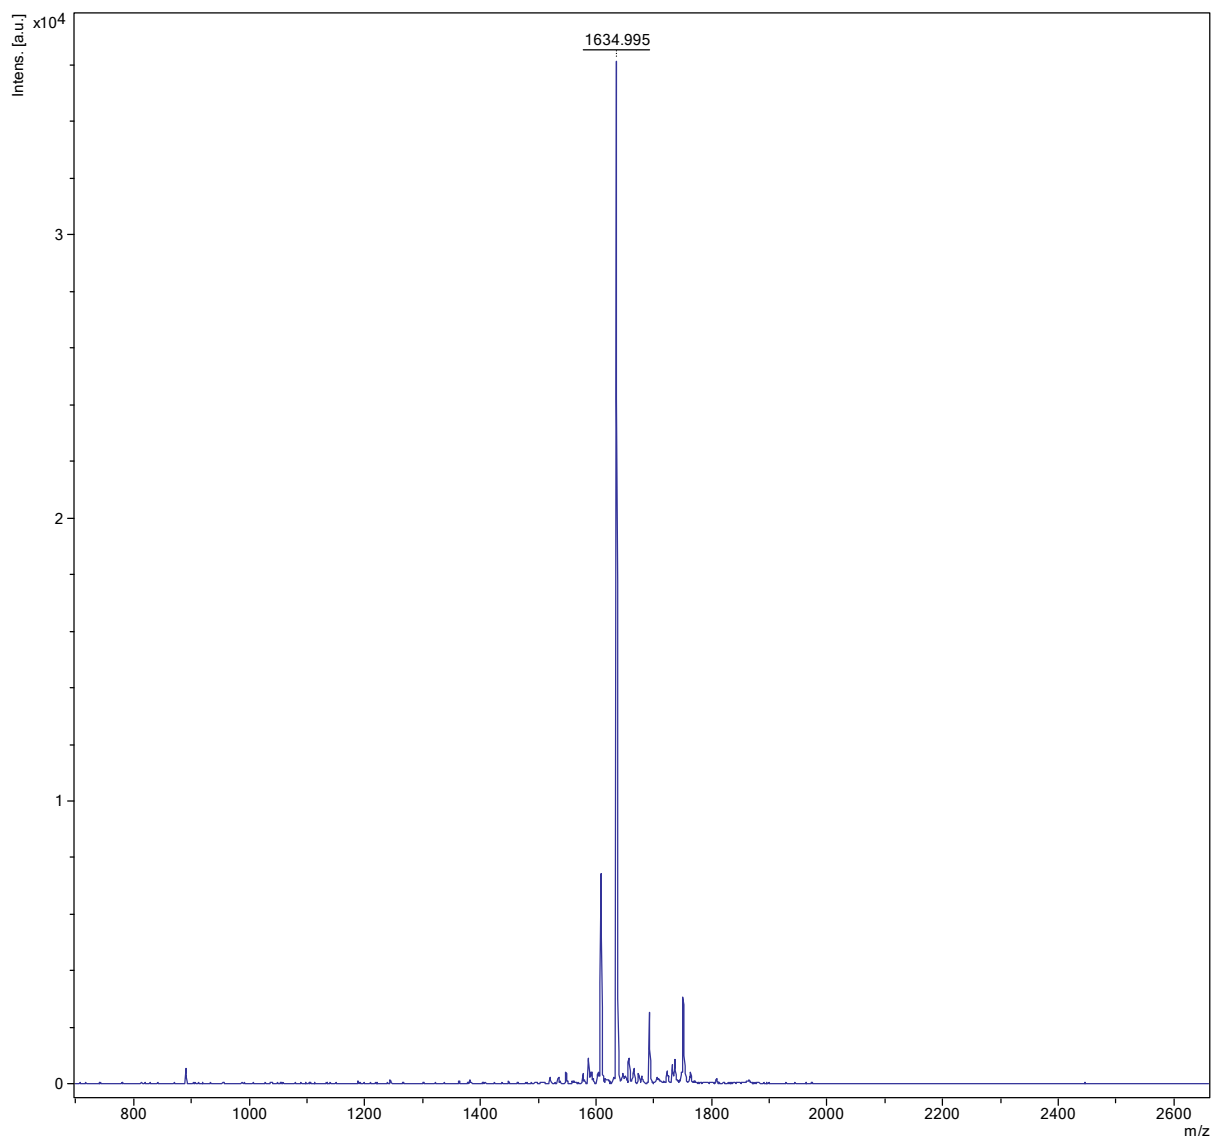

**Supplementary Figure S3.** HPLC trace of azide terminated GAD 541-554 peptide 2

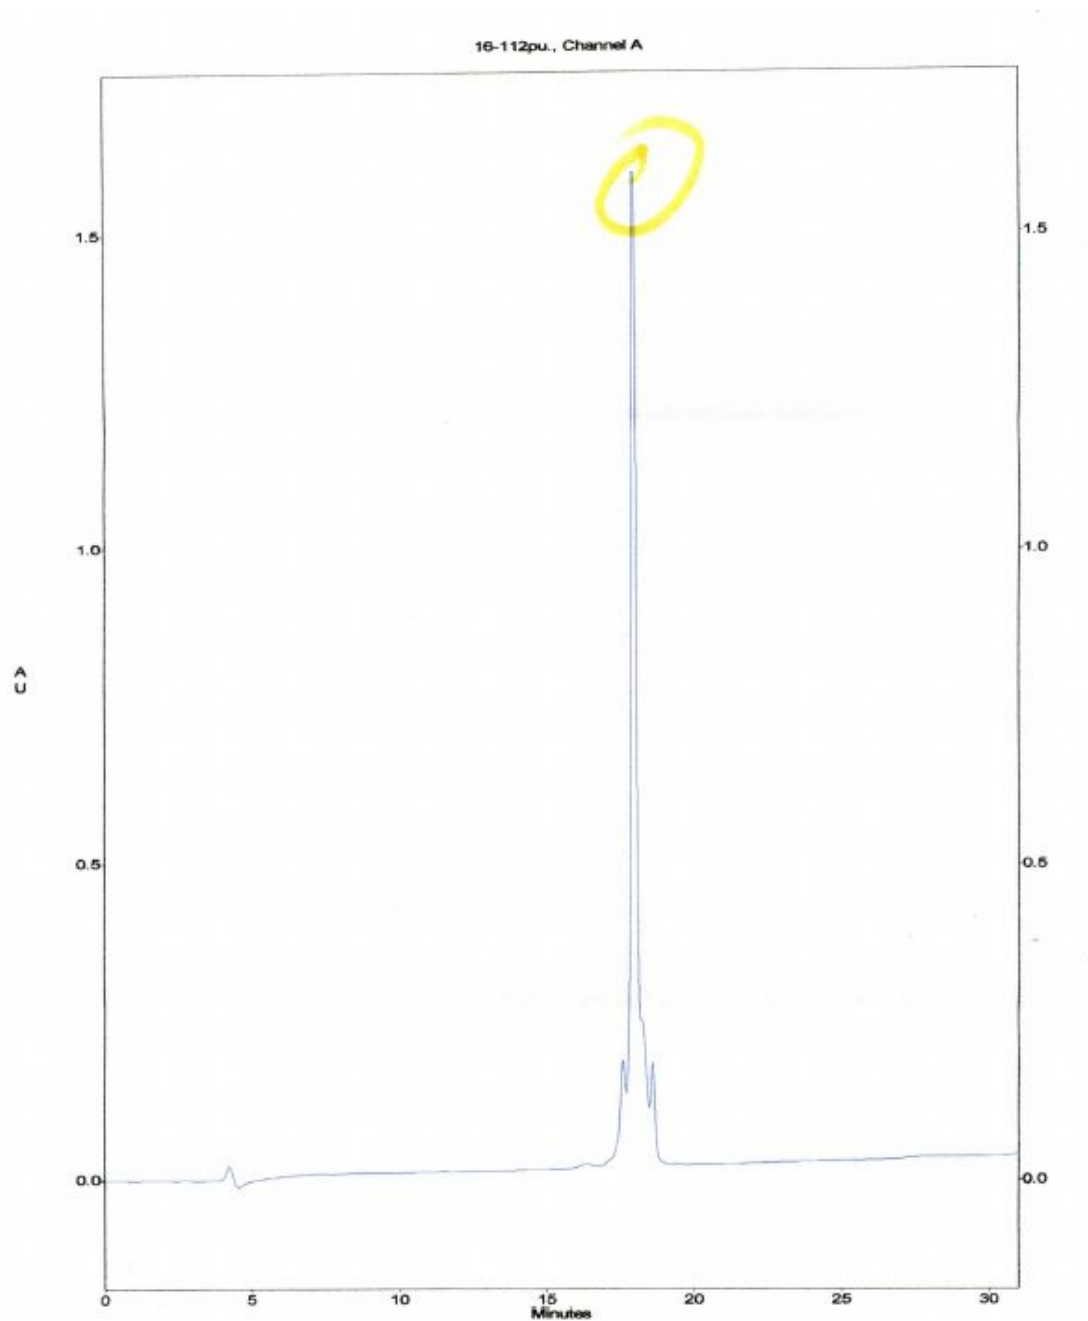

Vydac C18 column was used with gradient elution (5-60% acetonitrile) with a single peak at 214 nm (solvent A = 0.085% TFA in water; solvent B = 98% acetonitrile and 0.085% TFA in water).

**Supplementary Figure S4.** MALDI-MS data of Pam<sub>3</sub>CysSK<sub>4</sub> - GAD 541-554 peptide conjugate **2a**

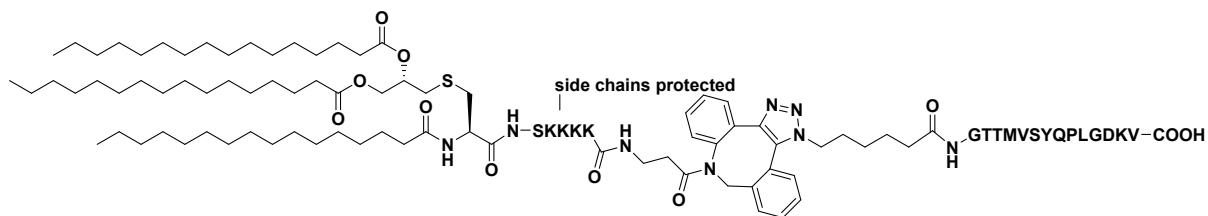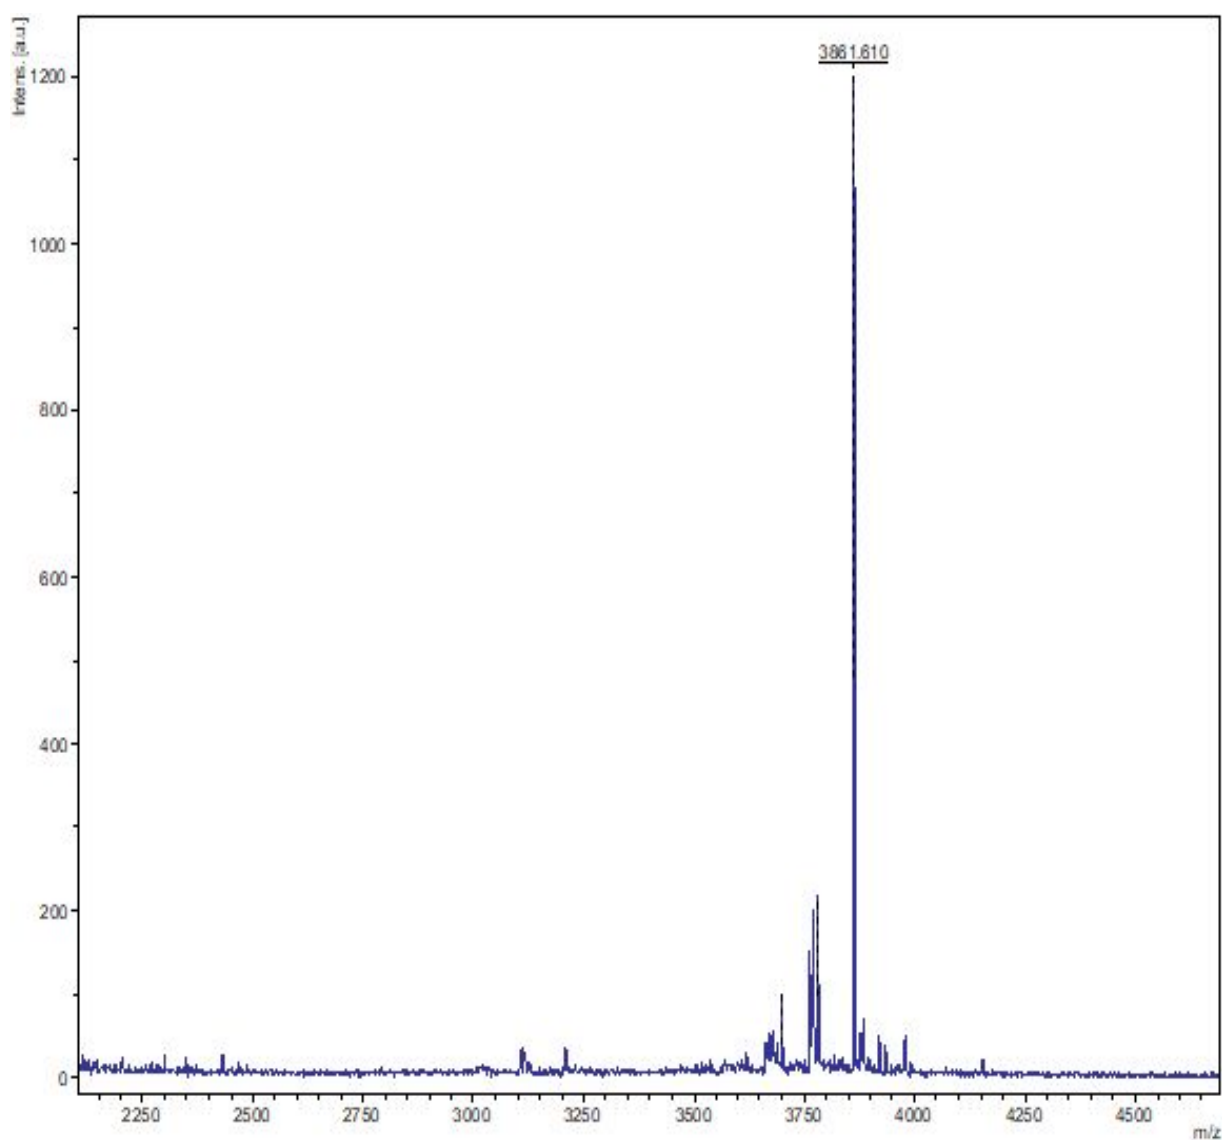

**Supplementary Figure S5.** MALDI-MS data of de-protected Pam<sub>3</sub>CysSK<sub>4</sub> - GAD 541-554 peptide conjugate **2b**

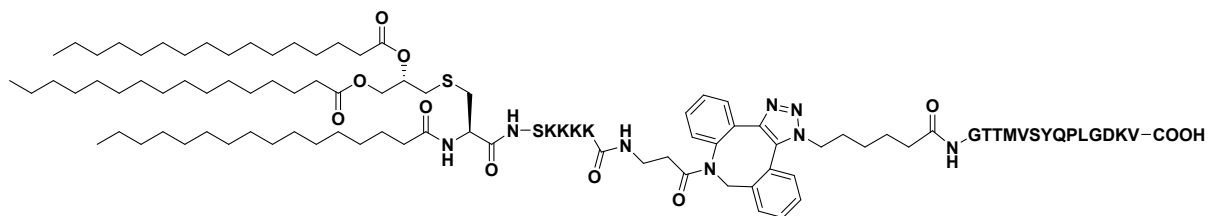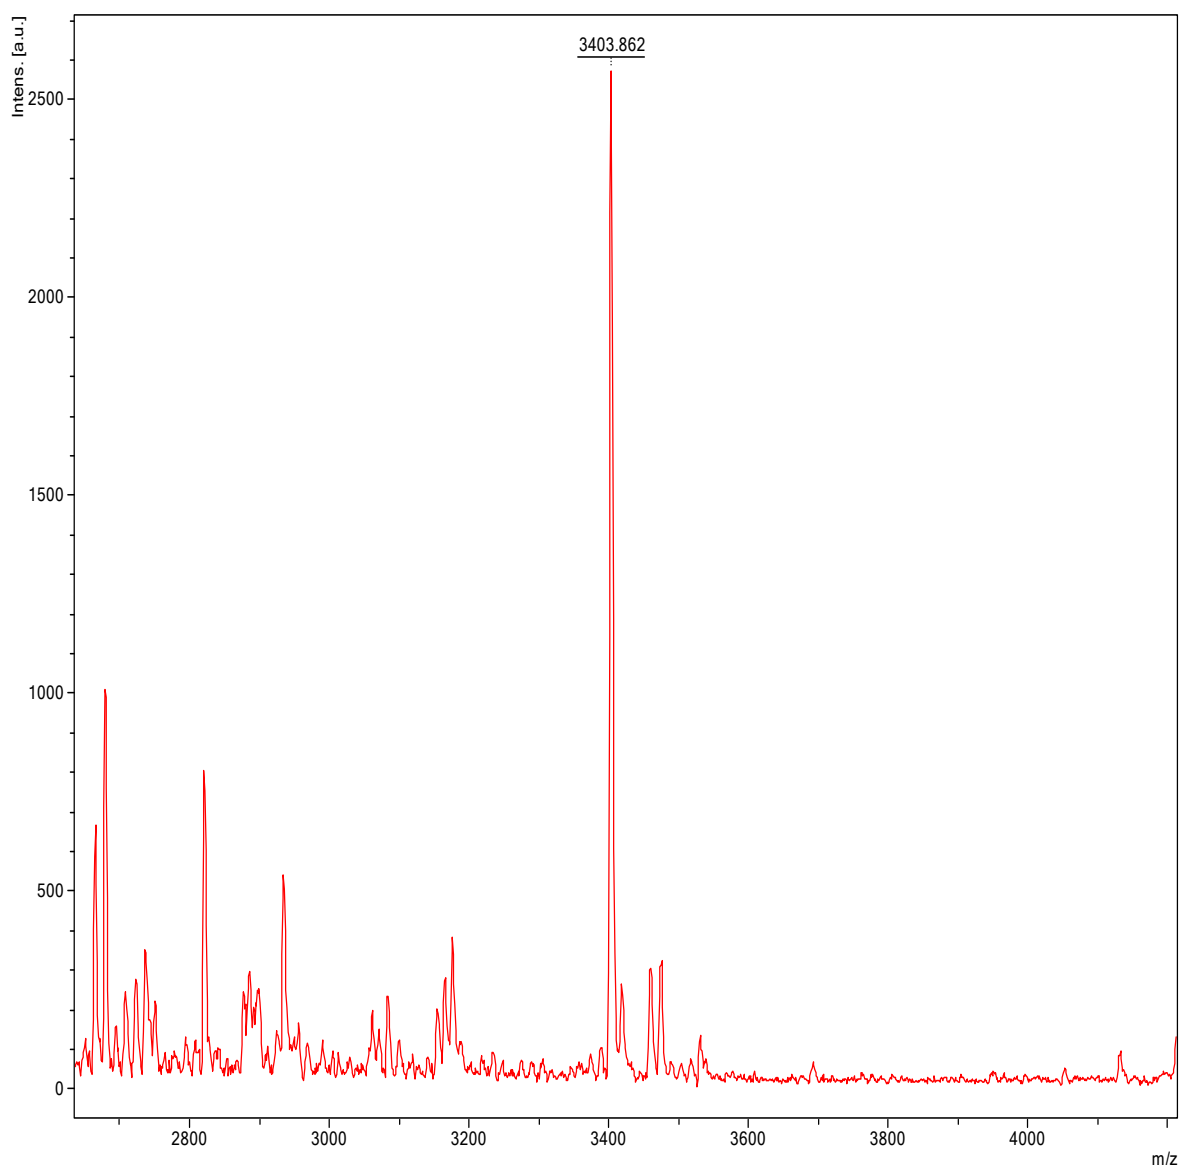

**Supplementary Figure S6.** MALDI-MS data for azide terminated altered peptide ligand (APL) 3

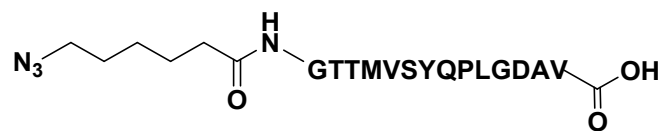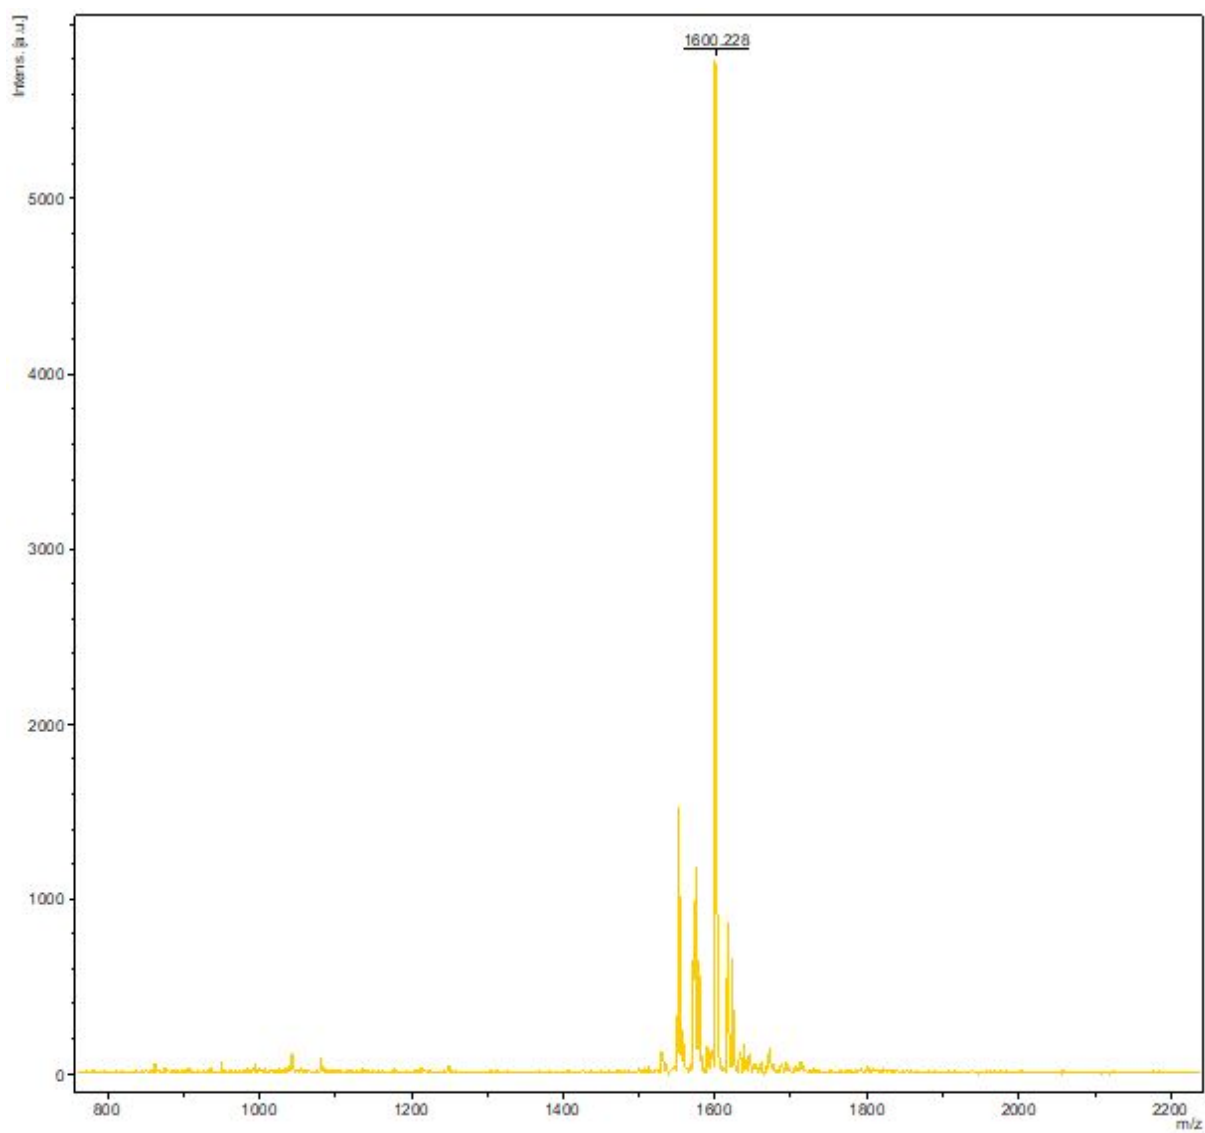

**Supplementary Figure S7. HPLC trace of azide terminated altered peptide ligand (APL) 3**

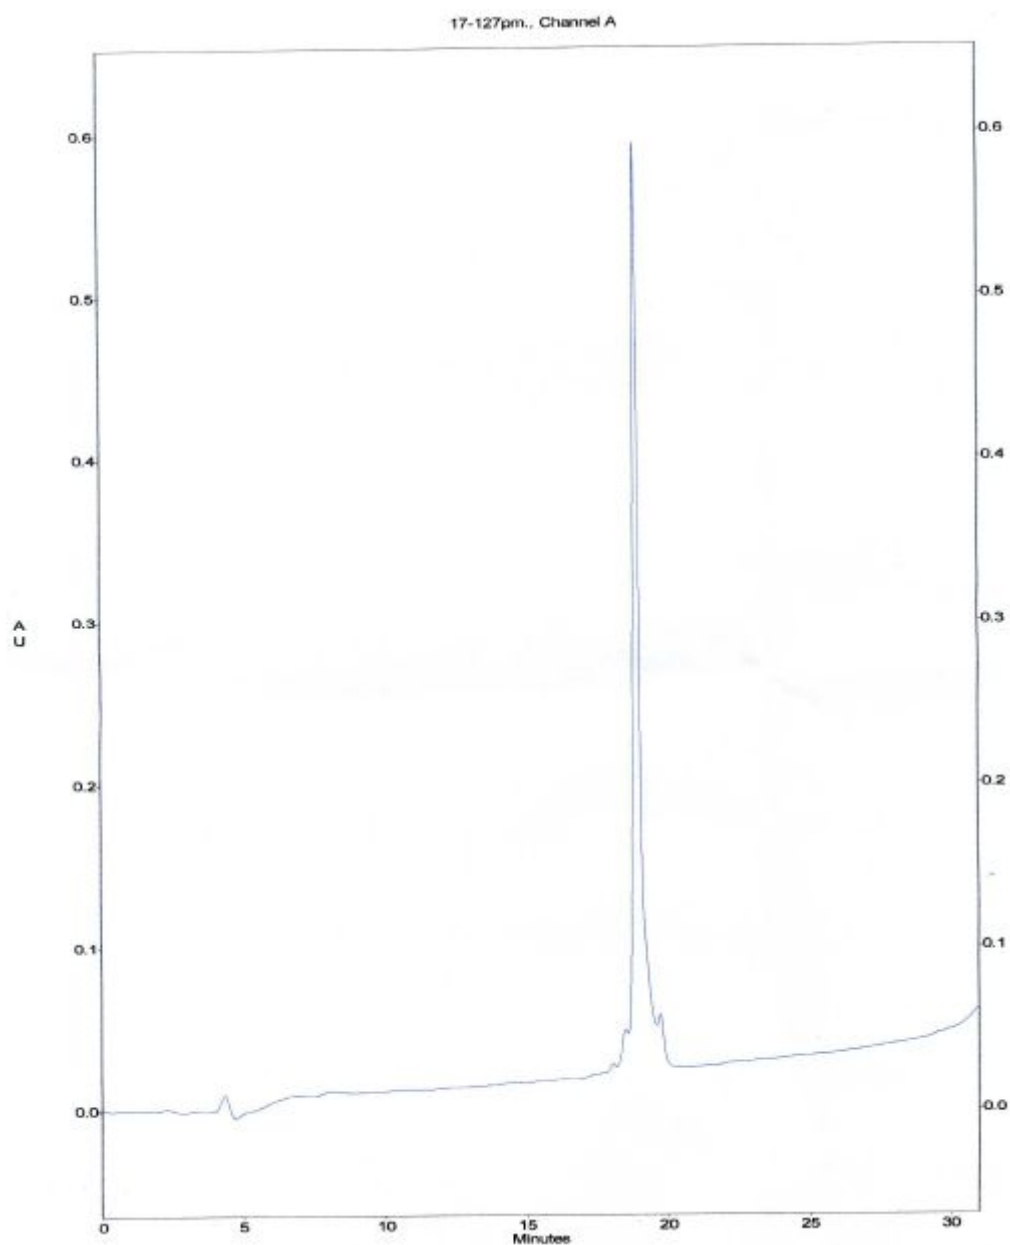

Vydac C18 column was used with gradient elution (5-60% acetonitrile) with a single peak at 214 nm (solvent A = 0.085% TFA in water; solvent B = 98% acetonitrile and 0.085% TFA in water).



Supplementary Figure S8. MALDI-MS data of Pam<sub>3</sub>CysSK<sub>4</sub> - APL conjugate **3a**

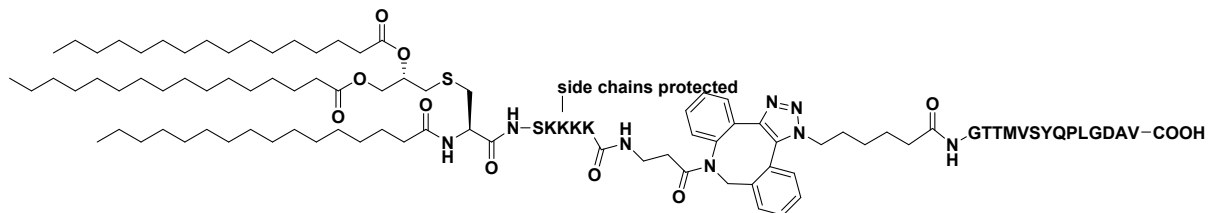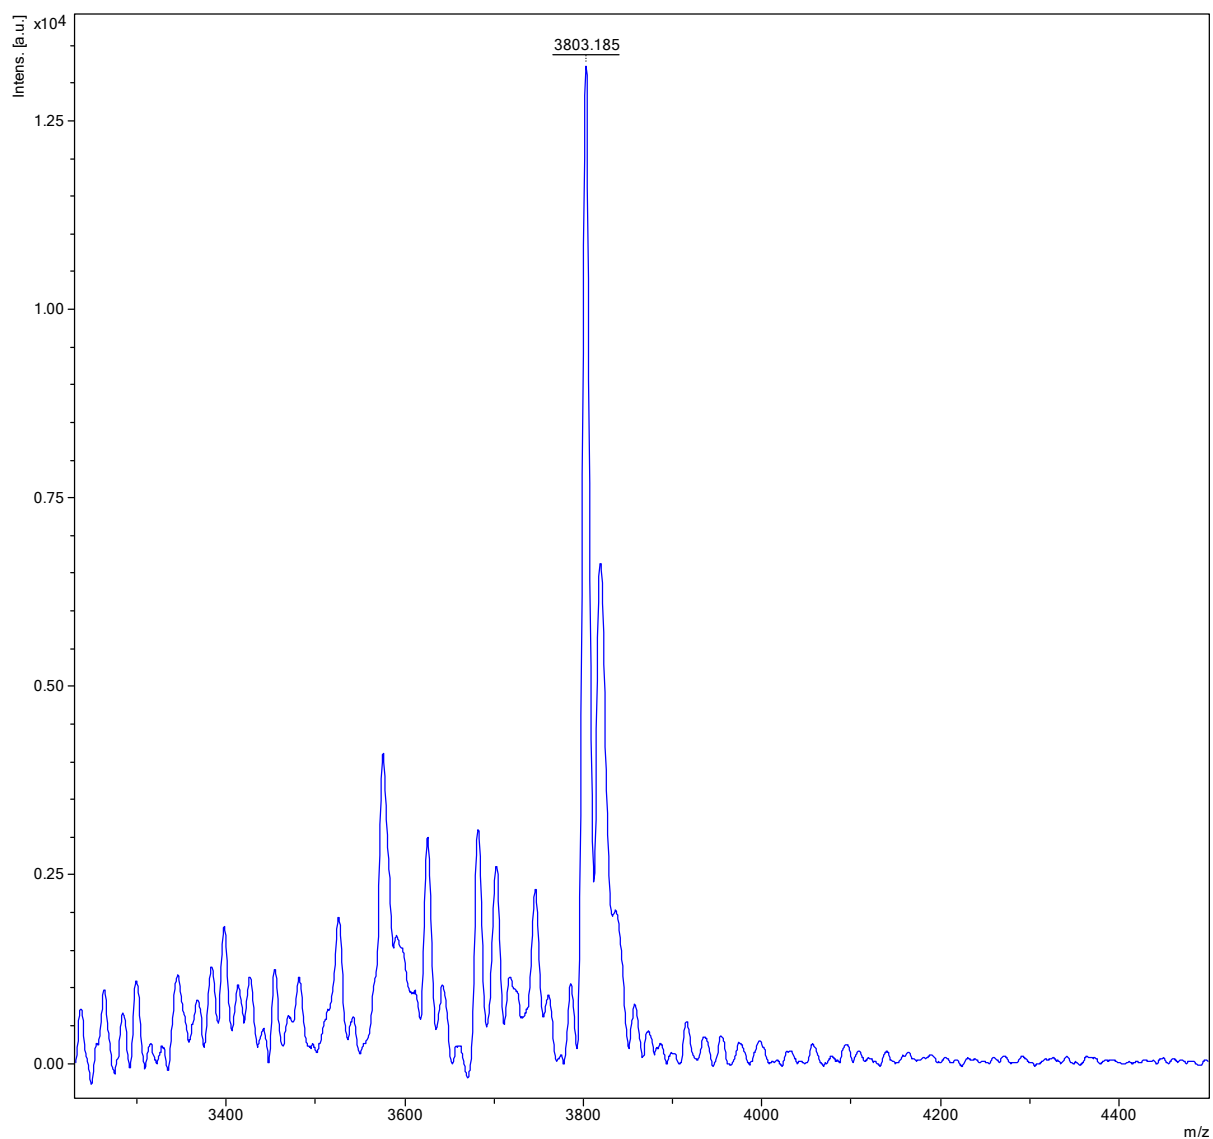

Supplement: NIHMS1044430-supplement-supporting_information.pdf [file NIHMS1044430-supplement-supporting_information.pdf]
